# Supplementary material
Source: PubMed Central journal article supplement (PMC141026)

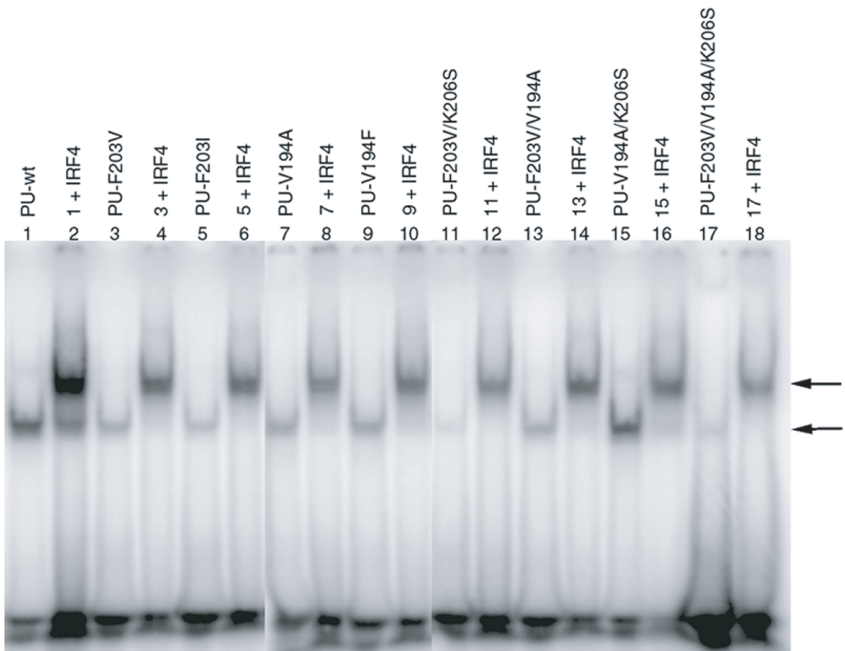

Supplement: pnas_0136910100_2.pdf [file pnas_0136910100_2.pdf]

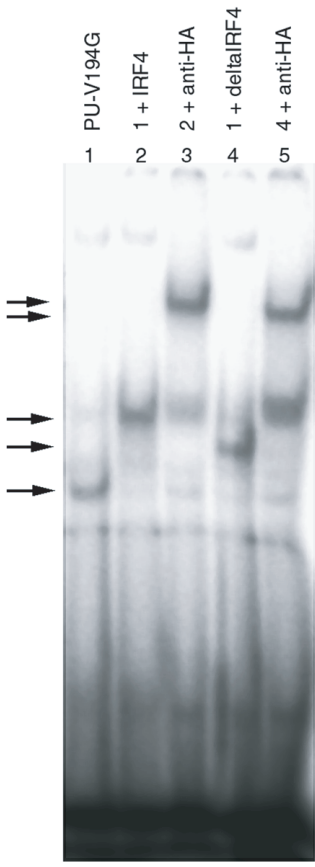

Supplement: pnas_0136910100_4.pdf [file pnas_0136910100_4.pdf]

1 Free Probe

2  $\Delta$ IRF4

3 PU(129-272)-M187C

4 3+ $\Delta$ IRF4

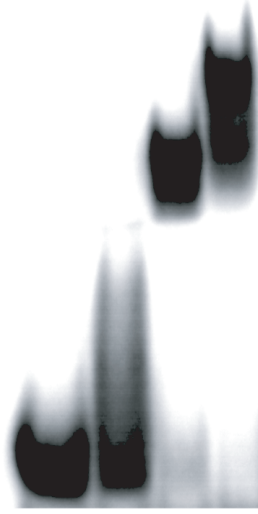

Supplement: pnas_0136910100_6.pdf [file pnas_0136910100_6.pdf]
